# Supplementary material for: Near-infrared photothermal liposomal nanoantagonists for amplified cancer photodynamic therapy
Source: Royal Society of Chemistry journal article supplement (doi:10.1039/d0tb01437k), 2020-01-01
Supplement: d0tb01437k1.pdf [file d0tb01437k1.pdf]

## Supporting Information

### Near-infrared photothermal liposomal nanoantagonists for amplified cancer photodynamic therapy

Haitao Sun,<sup>a,1</sup> Meixia Feng,<sup>b,1</sup> Siyu Chen,<sup>c,1</sup> Ruizhi Wang,<sup>a</sup> Yu Luo,<sup>d</sup> Bo Yin,<sup>e,\*</sup> Jingchao Li,<sup>f,\*</sup>  
Xiaolin Wang,<sup>a,\*</sup>

<sup>1</sup> H. Sun, M. Feng, and S. Chen contributed equally to this work.

#### \*Corresponding authors:

Email: yinbo7@163.com (B. Yin), lijingchao1018@126.com (J. Li) and fduwangxiaolin@hotmail.com (X. Wang)

*a Shanghai Institute of Medical Imaging, Department of Interventional Radiology, Zhongshan Hospital, Fudan University, Shanghai, 200032, China*

*b Department of Pharmacy, Shanghai Municipal Hospital of Traditional Chinese Medicine, Shanghai University of Traditional Chinese Medicine, Shanghai 200071, China*

*c Department of Medical Imaging, the third Affiliated Hospital, orthopedic Hospital of Guangdong province, Southern Medical University, Guangdong 510000, China*

*d School of Chemical Science and Engineering, Tongji University, Shanghai, 200092, China*

*e Radiology Department, Huashan Hospital, Fudan University, Shanghai, 200040, China*

*f College of Chemistry, Chemical Engineering and Biotechnology, Donghua University, Shanghai, 201620, China*

<sup>1</sup> Haitao Sun, Meixia Feng, and Siyu Chen contributed equally to this work.

Electronic Supplementary Information (ESI) available: See DOI: 10.1039/x0xx00000x

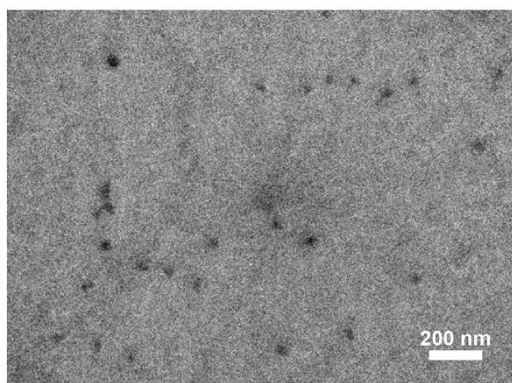

**Figure S1.** Representative TEM image of LI (scale bar = 200 nm).

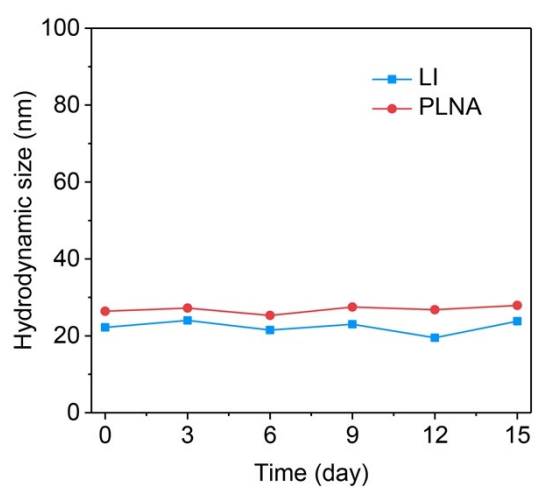

**Figure S2.** Hydrodynamic size of LI and PLNA after storage in PBS buffer for different days.

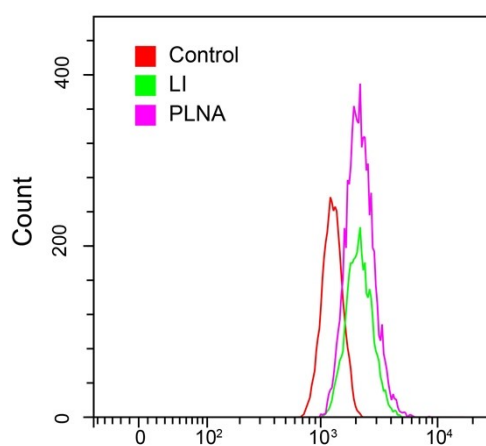

**Figure S3.** Flow cytometry assay of fluorescence intensity of 4T1 cancer cells after incubation with PBS (Control), LI and PLNA (ICG = 20  $\mu\text{g mL}^{-1}$ ) for 24 h.

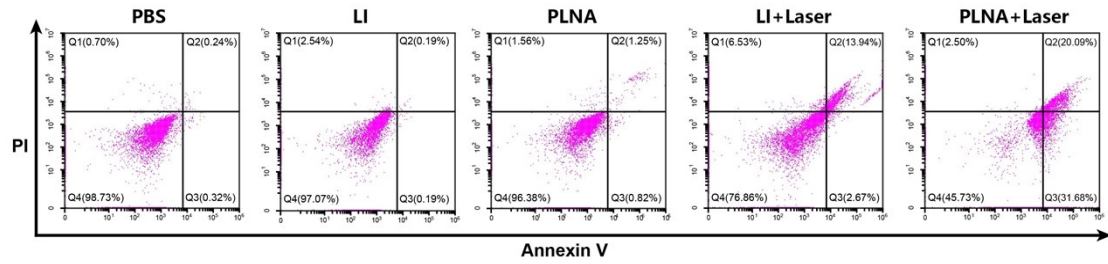

**Figure S4.** Apoptosis analysis of 4T1 cancer cells after treatments with PBS (Control), LI and PLNA ( $ICG = 20 \mu\text{g mL}^{-1}$ ) with or without 808 nm laser irradiation ( $0.6 \text{ W cm}^{-2}$ , 10 min).

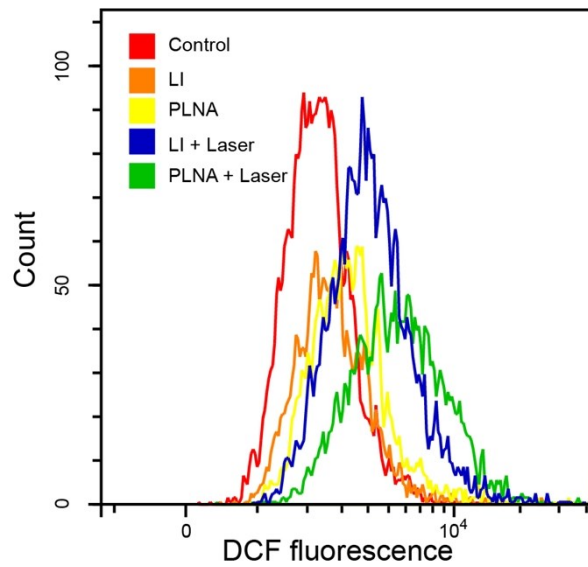

**Figure S5.** Flow cytometry analysis of DCF fluorescence intensity in 4T1 cancer cells after treatments with PBS (Control), LI and PLNA ( $ICG = 20 \mu\text{g mL}^{-1}$ ) with or without 808 nm laser irradiation ( $0.6 \text{ W cm}^{-2}$ , 10 min).

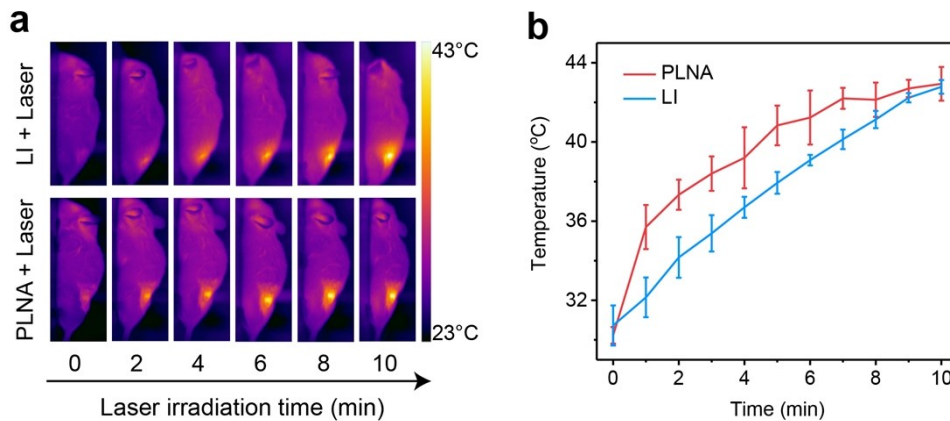

---

**Figure S6.** (a) Representative infrared thermal images and (b) temperature curves of tumors in 4T1 tumor-bearing mice after intravenous injection of LI and PLNA (200  $\mu$ L, ICG = 2 mg kg<sup>-1</sup>) under 808 nm laser irradiation (0.6 W cm<sup>-2</sup>) for 10 min.

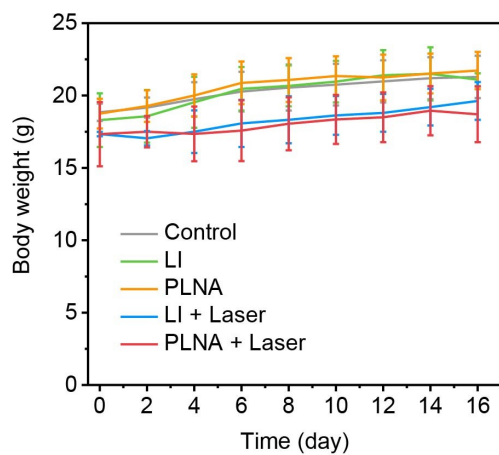

**Figure S7.** Body weights of 4T1 tumor-bearing mice after intravenous injection of saline (control), LI and PLNA (ICG = 2 mg kg<sup>-1</sup>) with or without 808 nm laser irradiation (0.6 W cm<sup>-2</sup>) for 10 min.
